# Supplementary material for: Using LC-MS/MS to Determine Salivary Steroid Reference Intervals in a European Older Adult Population
Source: MDPI journal article supplement (doi:10.3390/metabo13020265), 2023-02-13
Supplement: s1 [file s1]

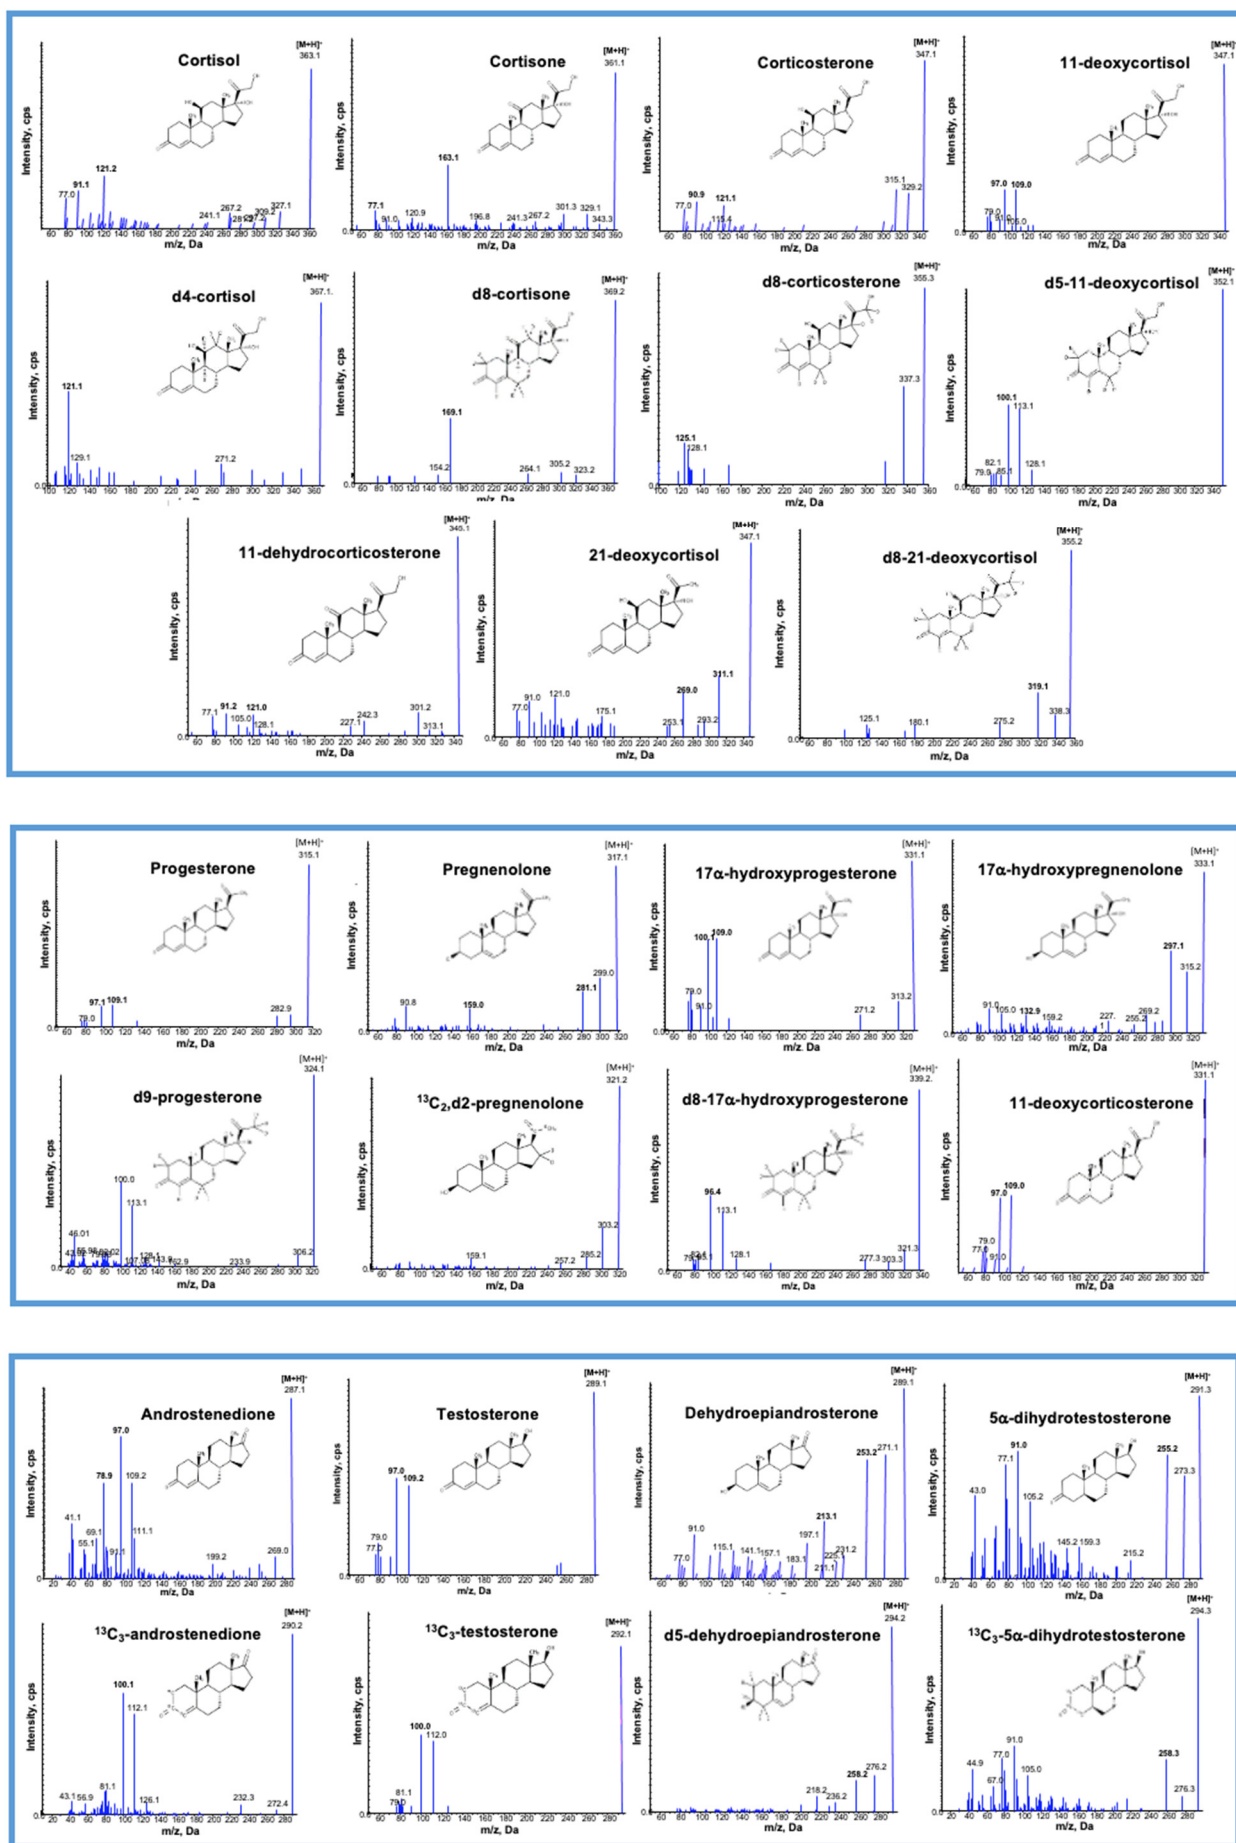

**Figure S1** Electrospray ionisation product ion mass spectra of protonated **androgens, progestogens and corticoids** prepared in 50% methanol at 10 ng/mL or less, through infusion at a flow rate of 2 mL/min into a QTrap 6500+ turbospray electrospray ionisation source in positive mode, with a collision energy offset of 46V. Precursor ion masses

are indicated on the right hand side of each mass spectrum and product ions selected for the method are indicated in bold.

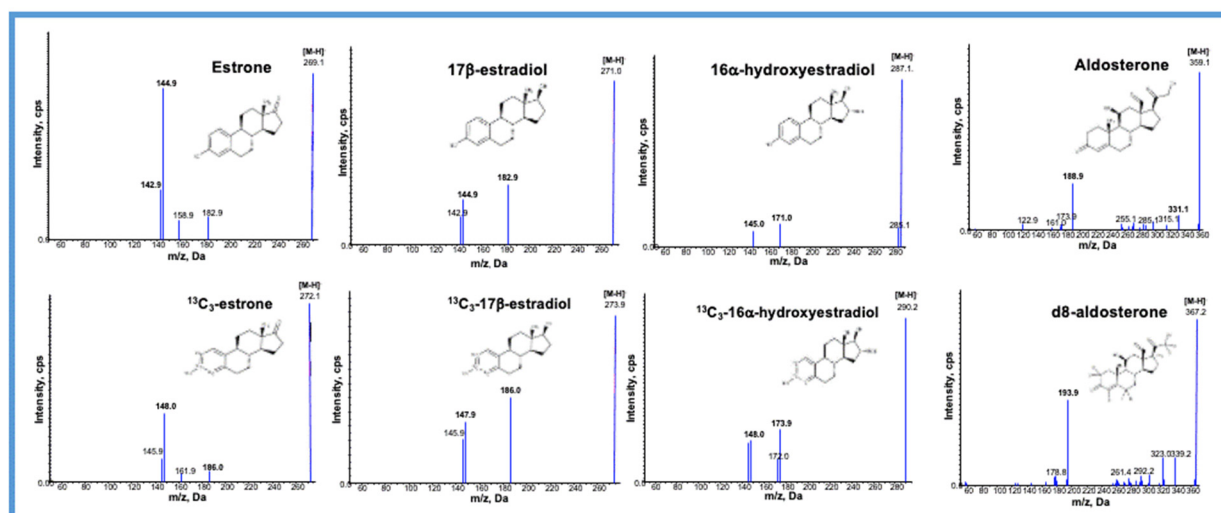

**Figure S2** Electrospray ionisation product ion mass spectra of deprotonated estrogens and aldosterone prepared in 50% methanol at 1 mg/mL or less, through infusion at a flow rate of 2 mL/min into a QTrap 6500+ turbospray electrospray ionisation source in negative mode, with a collision energy offset of 46V. Precursor ions for estrone, estradiol, estriol and aldosterone were  $m/z$  269.1, 271.0, 290.1 and 359.1, respectively. Precursor ions for their isotopically labelled counterparts were  $m/z$  272.1, 273.9, 290.2 and 367.2, respectively.

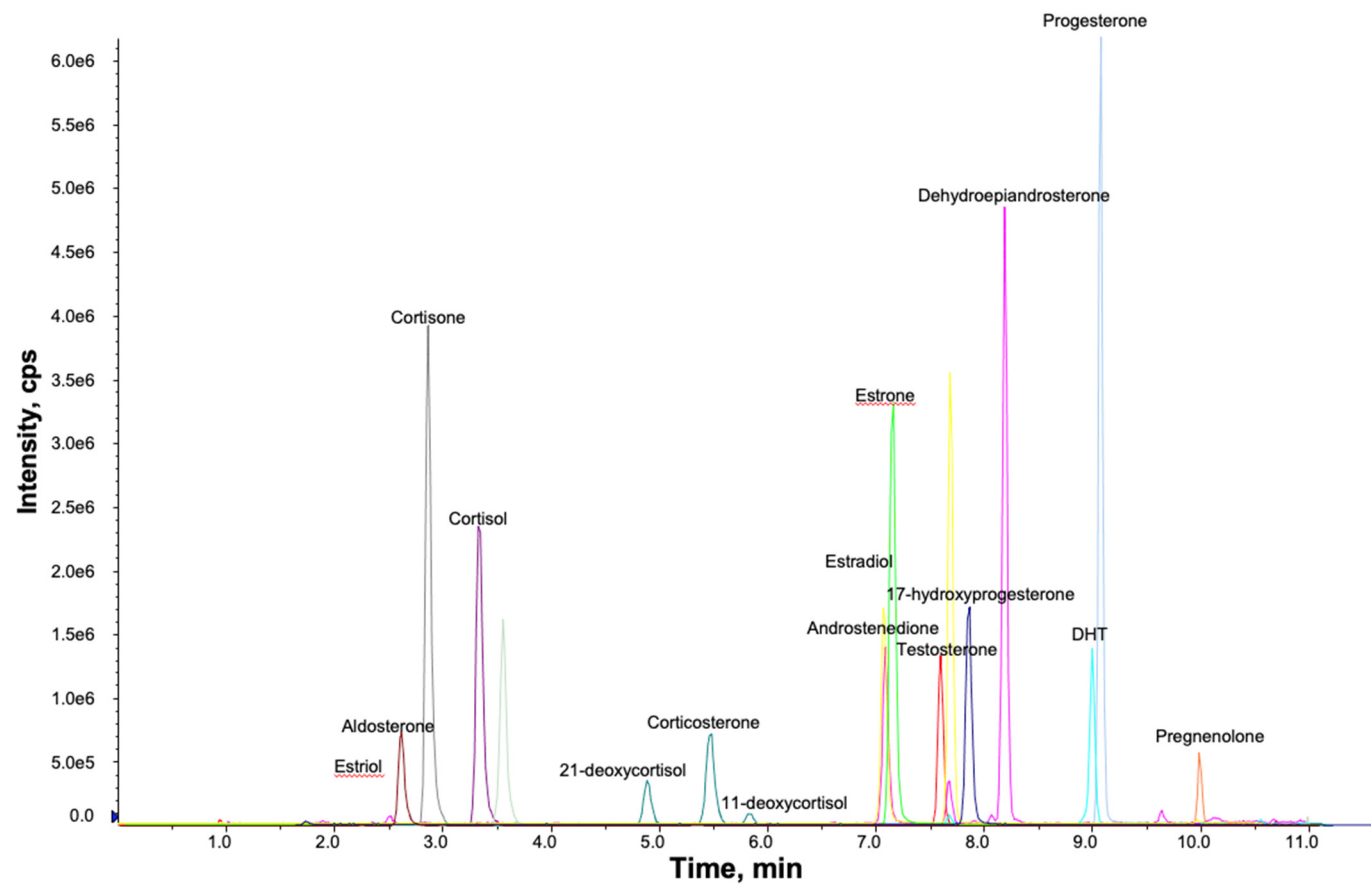

**Figure S3.** Representative chromatogram of steroids measured by LC-MS/MS, with quantifier parent-product ion transitions. Certified reference steroids ranging between 0.1 ng - 10 ng, separated on a Kinetex C18 (2.1 x 150 mm; 2. 6um) column. Positive ions for all steroids except estrone, estradiol, 16a-hydroxyestradiol and aldosterone.

**Table S1.** Confidence intervals (95%) of steroid hormones in full cohort, by sex and by disease status. All data presented in nM; AD: Alzheimer's disease; CI: confidence interval; n: number; A4- Androstenedione; T- Testosterone; DHEA- Dehydroepiandrosterone; DHT- 5 $\alpha$ -dihydrotestosterone; P4- Progesterone; Preg- Pregnenolone; 17 $\alpha$ OH-Preg- 17 $\alpha$ -hydroxypregnenolone; 17 $\alpha$ OH-P4- 17 $\alpha$ -hydroxyprogesterone; 11-DOC- 11-deoxycorticosterone; A- 11-dehydrocorticosterone; S- 11-deoxycortisol; 21-DF- 21-deoxycortisol; B-corticosterone; E- cortisone; F- cortisol; . E1- Estrone; E2- Estradiol; E3- 16-hydroxyestradiol; Aldo- Aldosterone; nM: nanomolar.

| Steroid | Sample timepoint | All |                   | Male |                   | Female |                   | Healthy |                   | AD biomarker positive |                   |
|---------|------------------|-----|-------------------|------|-------------------|--------|-------------------|---------|-------------------|-----------------------|-------------------|
|         |                  | n   | 95% CI            | n    | 95% CI            | n      | 95% CI            | n       | 95% CI            | n                     | 95% CI            |
| A4      | 1<br>(~08:18am)  | 45  | 0.1203,<br>0.1777 | 28   | 0.1349,<br>0.2110 | 17     | 0.0769,<br>0.1355 | 26      | 0.1054,<br>0.1568 | 19                    | 0.1216,<br>0.2243 |
|         | 2<br>(~11:24am)  | 43  | 0.0962,<br>0.1327 | 28   | 0.1016,<br>0.1557 | 15     | 0.0712,<br>0.1015 | 30      | 0.0902,<br>0.1376 | 13                    | 0.0855,<br>0.1513 |
|         | 3<br>(~15:28pm)  | 35  | 0.0822,<br>0.1399 | 25   | 0.0836,<br>0.1572 | 10     | 0.0629,<br>0.1007 | 27      | 0.0756,<br>0.1224 | 8                     | 0.0781,<br>0.2365 |
|         | 4<br>(~21:43pm)  | 36  | 0.0828,<br>0.1441 | 21   | 0.0955,<br>0.1570 | 15     | 0.0456,<br>0.1604 | 25      | 0.0737,<br>0.1522 | 11                    | 0.0756,<br>0.1745 |
|         | 1<br>(~08:18am)  | 60  | 0.0590,<br>0.0899 | 48   | 0.0694,<br>0.1032 | 12     | 0.0156,<br>0.0317 | 36      | 0.0661,<br>0.1072 | 24                    | 0.0368,<br>0.0782 |
| T       | 2<br>(~11:24am)  | 61  | 0.0538,<br>0.0798 | 50   | 0.0634,<br>0.0919 | 11     | 0.0080,<br>0.0247 | 39      | 0.0538,<br>0.0862 | 22                    | 0.0406,<br>0.0799 |
|         | 3<br>(~15:28pm)  | 60  | 0.0457,<br>0.0699 | 48   | 0.0537,<br>0.0813 | 12     | 0.0063,<br>0.0272 | 36      | 0.0475,<br>0.0812 | 24                    | 0.0320,<br>0.0660 |
|         | 4                | 54  | 0.0481,<br>0.0738 | 46   | 0.0532,<br>0.0804 | 8      | 0.0069,<br>0.0293 | 34      | 0.0452,<br>0.0768 | 20                    | 0.0309,<br>0.0809 |



|            |            |    |                   |    |                    |    |                   |    |                   |    |                   |
|------------|------------|----|-------------------|----|--------------------|----|-------------------|----|-------------------|----|-------------------|
| Preg       | 2          |    |                   |    |                    |    |                   |    |                   |    |                   |
|            | (~11:24am) | 24 | 0.0396,<br>0.1355 | 11 | 0.0348,<br>0.1783  | 13 | 0.0125,<br>0.1536 | 16 | 0.0168,<br>0.0936 | 8  | 0.0517,<br>0.2764 |
|            | 3          |    |                   |    |                    |    |                   |    |                   |    |                   |
|            | (~15:28pm) | 27 | 0.0570,<br>0.2088 | 12 | 0.0296,<br>0.2800  | 15 | 0.0235,<br>0.2359 | 17 | 0.0194,<br>0.0610 | 10 | 0.1206,<br>0.4604 |
|            | 4          |    |                   |    |                    |    |                   |    |                   |    |                   |
|            | (~21:43pm) | 24 | 0.0619,<br>0.2595 | 15 | 0.0599,<br>0.3149  | 9  | 0.0179,<br>0.2721 | 15 | 0.0506,<br>0.3030 | 9  | 0.0190,<br>0.2993 |
|            | 1          |    |                   |    |                    |    |                   |    |                   |    |                   |
|            | (~08:18am) | 28 | 0.1171,<br>0.2486 | 14 | 0.0998,<br>0.3036  | 14 | 0.0882,<br>0.2598 | 15 | 0.0521,<br>0.2214 | 13 | 0.1489,<br>0.3460 |
|            | 2          |    |                   |    |                    |    |                   |    |                   |    |                   |
|            | (~11:24am) | 28 | 0.1365,<br>0.3264 | 13 | 0.1158,<br>0.4934  | 15 | 0.1038,<br>0.2548 | 15 | 0.0824,<br>0.2617 | 13 | 0.1437,<br>0.4789 |
|            | 3          |    |                   |    |                    |    |                   |    |                   |    |                   |
|            | (~15:28pm) | 25 | 0.1321,<br>0.2454 | 11 | 0.0932,<br>0.2757  | 14 | 0.1199,<br>0.2472 | 13 | 0.0910,<br>0.2361 | 12 | 0.1346,<br>0.2845 |
| 17αOH-Preg | 4          |    |                   |    |                    |    |                   |    |                   |    |                   |
|            | (~21:43pm) | 28 | 0.1423,<br>0.2472 | 13 | 0.1579,<br>0.2924  | 15 | 0.0919,<br>0.2397 | 16 | 0.0941,<br>0.2216 | 12 | 0.1643,<br>0.3212 |
|            | 1          |    |                   |    |                    |    |                   |    |                   |    |                   |
|            | (~08:18am) | 4  | 0.0045,<br>0.2203 | 1  | NA                 | 3  | 0.0045,<br>0.2923 | 2  | 0.0557,<br>0.2923 | 2  | NA                |
|            | 2          |    |                   |    |                    |    |                   |    |                   |    |                   |
|            | (~11:24am) | 7  | 0.1188,<br>0.4229 | 2  | 0.1053,<br>0.78073 | 5  | 0.1165,<br>0.4313 | 3  | 0.1053,<br>0.2256 | 4  | 0.0835,<br>0.6156 |
|            | 3          |    |                   |    |                    |    |                   |    |                   |    |                   |
|            |            | 4  | 0.0045,<br>0.0604 | 2  | 0.0045,<br>0.0790  | 2  | 0.0045,<br>0.0211 | 2  | 0.0045,<br>0.0790 | 2  | 0.0045,<br>0.0211 |

|          |            |    |                   |    |                   |    |                   |    |                   |    |                   |
|----------|------------|----|-------------------|----|-------------------|----|-------------------|----|-------------------|----|-------------------|
|          | (~15:28pm) |    |                   |    |                   |    |                   |    |                   |    |                   |
|          | 4          |    |                   |    |                   |    |                   |    |                   |    |                   |
|          | (~21:43pm) | 4  | 0.0011,<br>0.1365 | 1  | NA                | 3  | 0.0000,<br>0.1805 | 1  | NA                | 3  | 0.0000,<br>0.1805 |
| 17αOH-P4 | 1          |    |                   |    |                   |    |                   |    |                   |    |                   |
|          | (~08:18am) | 31 | 0.0537,<br>0.1164 | 18 | 0.0476,<br>0.1187 | 13 | 0.0368,<br>0.1435 | 19 | 0.0488,<br>0.1310 | 12 | 0.0287,<br>0.1194 |
|          | 2          |    |                   |    |                   |    |                   |    |                   |    |                   |
|          | (~11:24am) | 28 | 0.0528,<br>0.1189 | 18 | 0.0517,<br>0.1283 | 10 | 0.0266,<br>0.1346 | 17 | 0.0617,<br>0.1373 | 11 | 0.0219,<br>0.1064 |
|          | 3          |    |                   |    |                   |    |                   |    |                   |    |                   |
|          | (~15:28pm) | 20 | 0.0278,<br>0.0755 | 14 | 0.0325,<br>0.0870 | 6  | 0.0045,<br>0.0765 | 10 | 0.0263,<br>0.0985 | 10 | 0.0160,<br>0.0732 |
|          | 4          |    |                   |    |                   |    |                   |    |                   |    |                   |
|          | (~21:43pm) | 23 | 0.0363,<br>0.0952 | 15 | 0.0378,<br>0.1081 | 8  | 0.0043,<br>0.1100 | 18 | 0.0414,<br>0.1145 | 5  | 0.0042,<br>0.0469 |
| 11-DOC   | 1          |    |                   |    |                   |    |                   |    |                   |    |                   |
|          | (~08:18am) | 10 | 0.0080,<br>0.0301 | 4  | 0.0053,<br>0.0416 | 6  | 0.0048,<br>0.0305 | 7  | 0.0082,<br>0.0370 | 3  | 0.0076,<br>0.0151 |
|          | 2          |    |                   |    |                   |    |                   |    |                   |    |                   |
|          | (~11:24am) | 8  | 0.0106,<br>0.0350 | 6  | 0.0095,<br>0.0335 | 2  | 0.0030,<br>0.0515 | 7  | 0.0091,<br>0.0370 | 1  | NA                |
|          | 3          |    |                   |    |                   |    |                   |    |                   |    |                   |
|          | (~15:28pm) | 11 | 0.0107,<br>0.0341 | 5  | 0.0070,<br>0.0372 | 6  | 0.0055,<br>0.0376 | 9  | 0.0188,<br>0.0387 | 2  | 0.0030,<br>0.0076 |
|          | 4          |    |                   |    |                   |    |                   |    |                   |    |                   |
|          | (~21:43pm) | 10 | 0.0109,<br>0.0378 | 6  | 0.0108,<br>0.0436 | 4  | 0.0030,<br>0.0428 | 7  | 0.0158,<br>0.0471 | 3  | 0.0030,<br>0.0136 |

|       |            |    |                   |    |                   |    |                   |    |                   |    |                   |
|-------|------------|----|-------------------|----|-------------------|----|-------------------|----|-------------------|----|-------------------|
| A     | 1          |    |                   |    |                   |    |                   |    |                   |    |                   |
|       | (~08:18am) | 97 | 0.826,<br>1.214   | 50 | 0.6914,<br>1.0676 | 47 | 0.844,<br>1.549   | 59 | 0.7283,<br>1.2579 | 38 | 0.810,<br>1.385   |
|       | 2          |    |                   |    |                   |    |                   |    |                   |    |                   |
|       | (~11:24am) | 87 | 0.3223,<br>0.5402 | 43 | 0.3127,<br>0.7068 | 44 | 0.2861,<br>0.4225 | 53 | 0.2614,<br>0.3727 | 34 | 0.3514,<br>0.8211 |
| S     | 3          |    |                   |    |                   |    |                   |    |                   |    |                   |
|       | (~15:28pm) | 76 | 0.2413,<br>0.3582 | 41 | 0.2335,<br>0.3751 | 35 | 0.2155,<br>0.3897 | 47 | 0.2181,<br>0.3572 | 29 | 0.2364,<br>0.4030 |
|       | 4          |    |                   |    |                   |    |                   |    |                   |    |                   |
|       | (~21:43pm) | 62 | 0.1151,<br>0.2454 | 33 | 0.0980,<br>0.2698 | 29 | 0.0931,<br>0.2813 | 38 | 0.1074,<br>0.2601 | 24 | 0.0831,<br>0.2978 |
| 21-DF | 1          |    |                   |    |                   |    |                   |    |                   |    |                   |
|       | (~08:18am) | 58 | 0.611,<br>0.0937  | 28 | 0.0465,<br>0.0905 | 30 | 0.0642,<br>0.1070 | 36 | 0.0587,<br>0.0986 | 22 | 0.0533,<br>0.1007 |
|       | 2          |    |                   |    |                   |    |                   |    |                   |    |                   |
|       | (~11:24am) | 40 | 0.0196,<br>0.0537 | 23 | 0.0228,<br>0.0818 | 17 | 0.0199,<br>0.0202 | 20 | 0.0186,<br>0.0374 | 20 | 0.0146,<br>0.0780 |
|       | 3          |    |                   |    |                   |    |                   |    |                   |    |                   |
|       | (~15:28pm) | 17 | 0.0065,<br>0.0152 | 10 | 0.0058,<br>0.0167 | 7  | 0.0035,<br>0.0179 | 6  | 0.0087,<br>0.0178 | 11 | 0.0033,<br>0.0156 |
|       | 4          |    |                   |    |                   |    |                   |    |                   |    |                   |
|       | (~21:43pm) | 5  | 0.0029,<br>0.0234 | 3  | 0.0029,<br>0.0289 | 2  | 0.0029,<br>0.0274 | 4  | 0.0029,<br>0.0281 | 1  | NA                |
|       | 1          |    |                   |    |                   |    |                   |    |                   |    |                   |
|       | (~08:18am) | 2  | 0.700,<br>0.0734  | 2  | 0.700,<br>0.0734  | 0  | NA                | 2  | 0.700,<br>0.0734  | 0  | NA                |
|       | 2          |    |                   |    |                   |    |                   |    |                   |    |                   |
|       |            | 4  | 0.0058,<br>0.0318 | 3  | 0.0029,<br>0.0348 | 1  | NA                | 2  | 0.0144,<br>0.0348 | 2  | 0.0029,<br>0.0289 |





|    |                 |     |                   |    |                   |    |                   |    |                   |    |                   |
|----|-----------------|-----|-------------------|----|-------------------|----|-------------------|----|-------------------|----|-------------------|
| F  | 4<br>(~21:43pm) | 112 | 4.144,<br>6.101   | 59 | 4.215,<br>7.600   | 53 | 3.422,<br>5.499   | 66 | 4.062,<br>6.356   | 46 | 3.454,<br>7.151   |
|    | 1<br>(~08:18am) | 114 | 4.851,<br>7.009   | 59 | 4.376,<br>7.605   | 55 | 4.649,<br>7.503   | 69 | 4.433,<br>7.008   | 45 | 4.436,<br>8.084   |
|    | 2<br>(~11:24am) | 110 | 2.243,<br>3.514   | 59 | 2.234,<br>4.356   | 51 | 1.903,<br>2.930   | 66 | 1.846,<br>2.870   | 44 | 2.375,<br>5.132   |
|    | 3<br>(~15:28pm) | 109 | 1.303,<br>2.094   | 57 | 1.341,<br>2.759   | 52 | 1.008,<br>1.534   | 65 | 1.129,<br>1.756   | 44 | 1.292,<br>2.896   |
|    | 4<br>(~21:43pm) | 104 | 0.809,<br>1.422   | 52 | 0.719,<br>1.559   | 52 | 0.687,<br>1.582   | 61 | 0.738,<br>1.444   | 43 | 0.698,<br>1.748   |
| E1 | 1<br>(~08:18am) | 25  | 0.0070,<br>0.0341 | 17 | 0.0045,<br>0.0126 | 8  | 0.0069,<br>0.0842 | 14 | 0.0099,<br>0.0532 | 11 | 0.0020,<br>0.0076 |
|    | 2<br>(~11:24am) | 22  | 0.0052,<br>0.0139 | 13 | 0.0045,<br>0.0118 | 9  | 0.0025,<br>0.0213 | 21 | 0.0054,<br>0.0149 | 1  | NA                |
|    | 3<br>(~15:28pm) | 25  | 0.0046,<br>0.0144 | 16 | 0.0035,<br>0.0113 | 9  | 0.0015,<br>0.0247 | 17 | 0.0057,<br>0.0194 | 8  | 0.0016,<br>0.0050 |
|    | 4<br>(~21:43pm) | 19  | 0.0048,<br>0.0101 | 14 | 0.0034,<br>0.0148 | 5  | 0.0040,<br>0.0100 | 15 | 0.0057,<br>0.0118 | 4  | 0.0018,<br>0.0040 |
| E2 | 1               | 12  | 0.0052,<br>0.0573 | 3  | NA                | 9  | 0.0057,<br>0.0751 | 11 | 0.0054,<br>0.0621 | 1  | NA                |

|      |            |    |                   |    |                   |   |                   |    |                   |   |                   |
|------|------------|----|-------------------|----|-------------------|---|-------------------|----|-------------------|---|-------------------|
|      | (~08:18am) |    |                   |    |                   |   |                   |    |                   |   |                   |
|      | 2          |    |                   |    |                   |   |                   |    |                   |   |                   |
|      | (~11:24am) | 9  | 0.0031,<br>0.0250 | 5  | 0.0029,<br>0.0295 | 4 | 0.0009,<br>0.0344 | 5  | 0.0015,<br>0.0282 | 4 | 0.0028,<br>0.0315 |
|      | 3          |    |                   |    |                   |   |                   |    |                   |   |                   |
|      | (~15:28pm) | 6  | 0.0037,<br>0.0315 | 4  | 0.0018,<br>0.0318 | 2 | 0.0037,<br>0.0445 | 3  | 0.0000,<br>0.0411 | 3 | 0.0037,<br>0.0445 |
|      | 4          |    |                   |    |                   |   |                   |    |                   |   |                   |
|      | (~21:43pm) | 6  | 0.0031,<br>0.0243 | 2  | 0.0055,<br>0.0437 | 4 | 0.0023,<br>0.0050 | 2  | 0.0028,<br>0.0337 | 4 | 0.0037,<br>0.0055 |
| E3   | 1          |    |                   |    |                   |   |                   |    |                   |   |                   |
|      | (~08:18am) | 12 | 0.0031,<br>0.0076 | 8  | 0.0044,<br>0.0093 | 4 | 0.0000,<br>0.0050 | 11 | 0.0039,<br>0.0081 | 1 | NA                |
|      | 2          |    |                   |    |                   |   |                   |    |                   |   |                   |
|      | (~11:24am) | 11 | 0.0041,<br>0.0227 | 6  | 0.0042,<br>0.0162 | 5 | 0.0014,<br>0.0354 | 8  | 0.0030,<br>0.0277 | 3 | 0.0017,<br>0.0078 |
|      | 3          |    |                   |    |                   |   |                   |    |                   |   |                   |
|      | (~15:28pm) | 13 | 0.0020,<br>0.0054 | 8  | 0.0022,<br>0.0073 | 5 | 0.0007,<br>0.0035 | 10 | 0.0019,<br>0.0062 | 3 | 0.0000,<br>0.0045 |
|      | 4          |    |                   |    |                   |   |                   |    |                   |   |                   |
|      | (~21:43pm) | 9  | 0.0037,<br>0.1741 | 8  | 0.0031,<br>0.0073 | 1 | NA                | 5  | 0.0047,<br>0.3095 | 4 | 0.0013,<br>0.0052 |
| Aldo | 1          |    |                   |    |                   |   |                   |    |                   |   |                   |
|      | (~08:18am) | 16 | 0.0359,<br>0.0961 | 9  | 0.0236,<br>0.0673 | 7 | 0.0381,<br>0.1550 | 10 | 0.0279,<br>0.1167 | 6 | 0.0314,<br>0.0853 |
|      | 2          |    |                   |    |                   |   |                   |    |                   |   |                   |
|      | (~11:24am) | 20 | 0.0375,<br>0.0741 | 12 | 0.0226,<br>0.0603 | 8 | 0.0442,<br>0.1115 | 14 | 0.0350,<br>0.0793 | 6 | 0.0227,<br>0.0829 |

|            |    |                   |    |                   |   |                   |    |                   |   |                   |
|------------|----|-------------------|----|-------------------|---|-------------------|----|-------------------|---|-------------------|
| 3          |    |                   |    |                   |   |                   |    |                   |   |                   |
| (~15:28pm) | 18 | 0.0298,<br>0.0794 | 10 | 0.0166,<br>0.0419 | 8 | 0.0373,<br>0.1363 | 15 | 0.0318,<br>0.0878 | 3 | 0.0000,<br>0.0895 |
| 4          |    |                   |    |                   |   |                   |    |                   |   |                   |
| (~21:43pm) | 14 | 0.0298,<br>0.0675 | 9  | 0.0252,<br>0.1068 | 5 | 0.0254,<br>0.0547 | 12 | 0.0302,<br>0.0712 | 2 | 0.0236,<br>0.0694 |

**Table S2.** Comparison of median values for steroids by sex and disease status. Data presented for all steroids where n>6. Comparisons analysed using Wilcoxon Signed Rank test in R. A4- Androstenedione; T- Testosterone; DHEA- Dehydroepiandrosterone; DHT- 5 $\alpha$ -dihydrotestosterone; P4- Progesterone; Preg- Pregnenolone; 17 $\alpha$ OH-Preg- 17 $\alpha$ -hydroxypregnenolone; 17 $\alpha$ OH-P4- 17 $\alpha$ -hydroxyprogesterone; 11-DOC- 11-deoxycorticosterone; A- 11-dehydrocorticosterone; S- 11-deoxycortisol; 21-DF- 21-deoxycortisol; B-corticosterone; E- cortisone; F- cortisol; . E1- Estrone; E2- Estradiol; E3- 16-hydroxyestradiol; Aldo- Aldosterone; W- Wilcoxon test statistic.

| Steroid | Sample<br>Time-point | Median                   |        | W     | p      | Median                   |      | W     | p     |
|---------|----------------------|--------------------------|--------|-------|--------|--------------------------|------|-------|-------|
|         |                      | Male                     | Female |       |        | Healthy                  | AD   |       |       |
| A4      | 1                    | 0.15                     | 0.10   | 109.5 | 0.003  | 0.13                     | 0.12 | 217   | 0.50  |
|         | 2                    | 0.11                     | 0.09   | 151   | 0.13   | 0.10                     | 0.11 | 180.5 | 0.71  |
|         | 3                    | 0.09                     | 0.08   | 106   | 0.50   | 0.08                     | 0.11 | 80    | 0.28  |
|         | 4                    | 0.10                     | 0.05   | 83    | 0.02   | 0.08                     | 0.10 | 112   | 0.39  |
| T       | 1                    | 0.08                     | 0.02   | 117   | 0.002  | 0.07                     | 0.04 | 551.5 | 0.07  |
|         | 2                    | 0.07                     | 0.01   | 61.5  | <0.001 | 0.06                     | 0.07 | 472   | 0.52  |
|         | 3                    | 0.06                     | 0.009  | 81    | 0.0001 | 0.06                     | 0.04 | 512.5 | 0.23  |
|         | 4                    | 0.07                     | 0.01   | 64    | 0.004  | 0.06                     | 0.06 | 333.5 | 0.91  |
| DHEA    | 1                    | 0.39                     | 0.60   | 400   | 0.90   | 0.68                     | 0.16 | 502   | 0.009 |
|         | 2                    | 0.48                     | 0.26   | 314   | 0.12   | 0.41                     | 0.33 | 443   | 0.49  |
|         | 3                    | 0.56                     | 0.23   | 422.5 | 0.43   | 0.41                     | 0.46 | 432   | 0.91  |
|         | 4                    | 0.35                     | 0.31   | 497.5 | 0.86   | 0.31                     | 0.35 | 417   | 0.33  |
| DHT     | 1                    | Insufficient sample size |        |       |        | Insufficient sample size |      |       |       |

|            |   |                          |       |      |      |                          |      |       |      |
|------------|---|--------------------------|-------|------|------|--------------------------|------|-------|------|
|            | 2 | Insufficient sample size |       |      |      | Insufficient sample size |      |       |      |
|            | 3 | Insufficient sample size |       |      |      | Insufficient sample size |      |       |      |
|            | 4 | Insufficient sample size |       |      |      | Insufficient sample size |      |       |      |
| P4         | 1 | 0.03                     | 0.03  | 87   | 0.86 | 0.03                     | 0.03 | 65    | 0.80 |
|            | 2 | 0.03                     | 0.02  | 46   | 0.14 | 0.02                     | 0.03 | 43.5  | 0.22 |
|            | 3 | 0.03                     | 0.03  | 88   | 0.94 | 0.02                     | 0.18 | 51.5  | 0.10 |
|            | 4 | 0.03                     | 0.03  | 61   | 0.72 | 0.03                     | 0.03 | 68.5  | 0.98 |
| Preg       | 1 | 0.17                     | 0.17  | 90.5 | 0.74 | 0.005                    | 0.20 | 66.5  | 0.15 |
|            | 2 | 0.22                     | 0.18  | 84   | 0.55 | 0.16                     | 0.22 | 83    | 0.52 |
|            | 3 | 0.20                     | 0.18  | 76.5 | 1    | 0.17                     | 0.21 | 63    | 0.43 |
|            | 4 | 0.19                     | 0.18  | 72   | 0.25 | 0.17                     | 0.25 | 58    | 0.08 |
| 17αOH-Preg | 1 | Insufficient sample size |       |      |      | Insufficient sample size |      |       |      |
|            | 2 | 0.44                     | 0.15  | 4    | 0.86 | 0.15                     | 0.21 | 5     | 0.86 |
|            | 3 | Insufficient sample size |       |      |      | Insufficient sample size |      |       |      |
|            | 4 | Insufficient sample size |       |      |      | Insufficient sample size |      |       |      |
| 17αOH-P4   | 1 | 0.06                     | 0.05  | 120  | 0.92 | 0.06                     | 0.04 | 134   | 0.43 |
|            | 2 | 0.04                     | 0.01  | 67   | 0.28 | 0.12                     | 0.02 | 117.5 | 0.27 |
|            | 3 | 0.03                     | 0.008 | 23.5 | 0.14 | 0.02                     | 0.02 | 61    | 0.43 |

|        |   |                          |       |       |      |                          |       |       |      |
|--------|---|--------------------------|-------|-------|------|--------------------------|-------|-------|------|
|        | 4 | 0.03                     | 0.005 | 31.5  | 0.07 | 0.03                     | 0.01  | 62    | 0.22 |
| 11-DOC | 1 | 0.02                     | 0.01  | 9     | 0.59 | 0.02                     | 0.008 | 12    | 0.82 |
|        | 2 | 0.02                     | 0.03  | 7     | 0.86 | 0.02                     | 0.02  | 4     | 1    |
|        | 3 | 0.03                     | 0.01  | 14    | 0.93 | 0.03                     | 0.005 | 12.5  | 0.48 |
|        | 4 | 0.03                     | 0.008 | 10    | 0.74 | 0.03                     | 0.003 | 17    | 0.16 |
| A      | 1 | 0.74                     | 0.71  | 1297  | 0.38 | 0.66                     | 0.83  | 1059  | 0.65 |
|        | 2 | 0.30                     | 0.30  | 904.5 | 0.73 | 0.29                     | 0.44  | 689   | 0.07 |
|        | 3 | 0.22                     | 0.19  | 660   | 0.55 | 0.22                     | 0.21  | 607.5 | 0.43 |
|        | 4 | 0.08                     | 0.09  | 545.5 | 0.35 | 0.09                     | 0.08  | 486.5 | 0.66 |
| S      | 1 | 0.05                     | 0.08  | 505   | 0.19 | 0.05                     | 0.06  | 394.5 | 0.99 |
|        | 2 | 0.03                     | 0.01  | 125   | 0.06 | 0.02                     | 0.02  | 230   | 0.42 |
|        | 3 | 0.009                    | 0.004 | 33    | 0.88 | 0.01                     | 0.004 | 47.5  | 0.15 |
|        | 4 | Insufficient sample size |       |       |      | Insufficient sample size |       |       |      |
| 21-DF  | 1 | Insufficient sample size |       |       |      | Insufficient sample size |       |       |      |
|        | 2 | Insufficient sample size |       |       |      | Insufficient sample size |       |       |      |
|        | 3 | Insufficient sample size |       |       |      | Insufficient sample size |       |       |      |
|        | 4 | Insufficient sample size |       |       |      | Insufficient sample size |       |       |      |
| B      | 1 | 0.08                     | 0.04  | 63    | 0.28 | 0.05                     | 0.16  | 55    | 0.11 |

|    |   |                          |       |        |      |                          |       |        |      |
|----|---|--------------------------|-------|--------|------|--------------------------|-------|--------|------|
|    | 2 | 0.03                     | 0.01  | 6      | 0.55 | 0.99                     | 0.01  | 1      | 0.11 |
|    | 3 | 0.02                     | 0.01  | 3.5    | 0.38 | 0.02                     | 0.03  | 8      | 0.88 |
|    | 4 | 0.02                     | 0.009 | 5      | 0.49 | 0.02                     | 0.003 | 7      | 0.25 |
| E  | 1 | 19.18                    | 19.09 | 1809   | 0.38 | 18.41                    | 20.44 | 1565   | 0.96 |
|    | 2 | 11.18                    | 10.96 | 1494   | 0.48 | 9.62                     | 13.17 | 1288   | 0.13 |
|    | 3 | 9.24                     | 5.44  | 1212.5 | 0.03 | 8.83                     | 7.61  | 1450   | 0.64 |
|    | 4 | 3.65                     | 3.33  | 1420   | 0.40 | 3.75                     | 3.33  | 1603   | 0.62 |
| F  | 1 | 4.55                     | 4.19  | 1722   | 0.57 | 4.30                     | 4.22  | 1503.5 | 0.78 |
|    | 2 | 2.17                     | 1.89  | 1433.5 | 0.67 | 1.79                     | 2.41  | 1165.5 | 0.08 |
|    | 3 | 1.30                     | 1.02  | 1249   | 0.16 | 1.05                     | 1.47  | 1204.5 | 0.16 |
|    | 4 | 0.53                     | 0.62  | 1388   | 0.82 | 0.60                     | 0.54  | 1334.5 | 0.88 |
| E1 | 1 | 0.004                    | 0.01  | 85.5   | 0.32 | 0.01                     | 0.004 | 112.5  | 0.05 |
|    | 2 | 0.004                    | 0.004 | 46.5   | 0.44 | 0.004                    | 0.002 | 17.5   | 0.30 |
|    | 3 | 0.004                    | 0.004 | 72     | 1    | 0.004                    | 0.003 | 88     | 0.25 |
|    | 4 | 0.004                    | 0.004 | 38.5   | 0.78 | 0.005                    | 0.003 | 46.5   | 0.10 |
| E2 | 1 | 0.004                    | 0.004 | 19.5   | 0.24 | 0.004                    | 0.004 | 7.5    | 0.61 |
|    | 2 | 0.004                    | 0.004 | 9      | 0.90 | 0.004                    | 0.01  | 8.5    | 0.80 |
|    | 3 | Insufficient sample size |       |        |      | Insufficient sample size |       |        |      |



|      | 4 | Insufficient sample size |       |      |       | Insufficient sample size |       |      |      |
|------|---|--------------------------|-------|------|-------|--------------------------|-------|------|------|
| E3   | 1 | 0.006                    | 0.002 | 5.5  | 0.09  | 0.00                     | 0.005 | 10.5 | 0.19 |
|      | 2 | 0.008                    | 0.003 | 9.5  | 0.36  | 0.006                    | 0.008 | 14   | 0.76 |
|      | 3 | 0.004                    | 0.003 | 11   | 0.19  | 0.003                    | 0.003 | 16.5 | 0.86 |
|      | 4 | 0.005                    | 0.51  | 8    | 0.17  | 0.009                    | 0.004 | 15.5 | 0.22 |
| Aldo | 1 | 0.03                     | 0.05  | 43   | 0.24  | 0.03                     | 0.04  | 24.5 | 0.59 |
|      | 2 | 0.03                     | 0.04  | 72.5 | 0.06  | 0.04                     | 0.03  | 52.5 | 0.41 |
|      | 3 | 0.03                     | 0.06  | 63   | 0.045 | 0.05                     | 0.02  | 29   | 0.48 |
|      | 4 | 0.03                     | 0.06  | 33   | 0.18  | 0.04                     | 0.05  | 10   | 0.78 |
